# Supplementary material
Source: publisher site journal article supplement (https://www.dovepress.com/article/324349)
Supplement: Supplementary file 1 [file get_supplementary_file.php]

**Supplementary Tables**

**Table 1**: Cardiovascular Related Adverse Drug Events Suspected to Be Caused by BNT162b2 vaccine Use in COVID -19.

|  | **Specific adverse event** | **Non-serious** | **Serious** | **Total** |
| --- | --- | --- | --- | --- |
| **Broad heading** | **n (%)** | **n (%)** | **n (%)** |
|  | **(n=2923)** | **(n=1278)** | **(n=4201)** |
| Cardiac Disorder(N=1655) | Acute coronary syndrome | 0(0.00) | 4(0.31) | 4(0.10) |
| Acute myocardial infarction | 1(0.03) | 15(1.17) | 16(0.38) |
| Angina pectoris | 7(0.24) | 5(0.39) | 12(0.29) |
| Arrhythmia | 14(0.48) | 5(0.39) | 19(0.45) |
| Arrhythmia supraventricular | 2(0.07) | 0(0.00) | 2(0.05) |
| Arteriospasm coronary | 0(0.00) | 1(0.08) | 1(0.02) |
| Atrial fibrillation | 9(0.31) | 23(1.80) | 32(0.76) |
| Atrial flutter | 1(0.03) | 1(0.08) | 2(0.05) |
| Atrial tachycardia | 0(0.00) | 2(0.16) | 2(0.05) |
| Atrioventricular block complete | 0(0.00) | 2(0.16) | 2(0.05) |
| Bradycardia | 11(0.38) | 17(1.33) | 28(0.67) |
| Bundle branch block right | 0(0.00) | 1(0.08) | 1(0.02) |
| Cardiac arrest | 1(0.03) | 32(2.50) | 33(0.79) |
| Cardiac discomfort | 3(0.10) | 0(0.00) | 3(0.07) |
| Cardiac disorder | 1(0.03) | 5(0.39) | 6(0.14) |
| Cardiac failure | 0(0.00) | 6(0.47) | 6(0.14) |
| Cardiac failure acute | 0(0.00) | 1(0.08) | 1(0.02) |
| Cardiac failure congestive | 0(0.00) | 1(0.08) | 1(0.02) |
| Cardiac fibrillation | 0(0.00) | 1(0.08) | 1(0.02) |
| Cardiac flutter | 12(0.41) | 1(0.08) | 13(0.31) |
| Cardiac valve disease | 0(0.00) | 1(0.08) | 1(0.02) |
| Cardio-respiratory arrest | 0(0.00) | 3(0.23) | 3(0.07) |
| Cardio-respiratory distress | 0(0.00) | 1(0.08) | 1(0.02) |
| Cardiogenic shock | 0(0.00) | 1(0.08) | 1(0.02) |
| Cardiopulmonary failure | 0(0.00) | 2(0.16) | 2(0.05) |
| Cardiovascular disorder | 5(0.17) | 7(0.55) | 12(0.29) |
| Coronary artery occlusion | 0(0.00) | 2(0.16) | 2(0.05) |
| Extrasystoles | 11(0.38) | 6(0.47) | 17(0.40) |
| Myocardial infarction | 2(0.07) | 26(2.03) | 28(0.67) |
| Myocardial ischaemia | 0(0.00) | 1(0.08) | 1(0.02) |
| Myocarditis | 1(0.03) | 5(0.39) | 6(0.14) |
| Palpitations | 456(15.60) | 141(11.03) | 597(14.210 |
| Postural orthostatic tachycardia syndrome | 0(0.00) | 1(0.08) | 1(0.02) |
| Right ventricular enlargement | 0(0.00) | 1(0.08) | 1(0.02) |
| Sinus bradycardia | 1(0.03) | 2(0.16) | 3(0.07) |
| Sinus tachycardia | 35(1.20) | 15(1.17) | 50(1.19) |
| Stress cardiomyopathy | 0(0.00) | 1(0.08) | 1(0.02) |
| Supraventricular extrasystoles | 5(0.17) | 0(0.00) | 5(0.12) |
| Supraventricular tachycardia | 10(0.34) | 12(0.94) | 22(0.52) |
| Tachyarrhythmia | 1(0.03) | 4(0.31) | 5(0.12) |
| Tachycardia | 486(16.63) | 191(14.95) | 677(16.12) |
| Tachycardia paroxysmal | 3(0.10) | 0(0.00) | 3(0.07) |
| Pericarditis | 2(0.07) | 5(0.39) | 7(0.17) |
| Tricuspid valve incompetence | 0(0.00) | 1(0.08) | 1(0.02) |
| Ventricular arrhythmia | 0(0.00) | 1(0.08) | 1(0.02) |
| Ventricular extrasystoles | 14(0.48) | 3(0.23) | 17(0.40) |
| Ventricular fibrillation | 0(0.00) | 1(0.08) | 1(0.02) |
| Ventricular tachycardia | 0(0.00) | 4(0.31) | 4(0.10) |

**Table 2**: Analysis of Electrocardiographic Findings among Reported Adverse Drug Events Associated with BNT162b2 PFIZER vaccine in COVID-19

| **Electrocardiogram findings** | **Specific findings** | **Non- Serious**  **n (%)**  **(N=640)** | **Serious**  **n (%)**  **(N=312)** | **Total**  **n (%)**  **(N=952)** |
| --- | --- | --- | --- | --- |
| Tachyarrhythmias  (N=143) | Arrhythmia supraventricular | 2(0.31) | 0(0.00) | 2(0.21) |
| Atrial fibrillation | 9(1.41) | 23(7.37) | 32(3.36) |
| Atrial flutter | 1(0.16) | 1(0.32) | 2(0.21) |
| Atrial tachycardia | 0(0.00) | 2(0.64) | 2(0.21) |
| Sinus tachycardia | 35(5.47) | 15(4.18) | 50(5.25) |
| Supraventricular extrasystoles | 5(0.78) | 0(0.00) | 5(0.53) |
| Supraventricular tachycardia | 10(1.56) | 12(3.85) | 22(2.31) |
| Tachyarrhythmia | 1(0.16) | 4(1.28) | 5(0.53) |
| Ventricular arrhythmia | 0(0.00) | 1(0.32) | 1(0.11) |
| Ventricular extrasystoles | 14(2.19) | 3(10.96 | 17(1.79) |
| Ventricular fibrillation | 0(0.00) | 1(0.32) | 1(0.11) |
| Ventricular tachycardia | 0(0.00) | 4(1.28) | 4(0.42) |
| Bradyarrhythmias  (N=34) | Atrioventricular block complete | 0(0.00) | 2(0.64) | 2(0.21) |
| Bundle branch block right | 0(0.00) | 1(0.32) | 1(0.11) |
| Bradycardia | 11(1.72) | 17(5.45) | 28(2.94) |
| Sinus bradycardia | 1(0.16) | 2(0.64) | 3(0.32) |
| Miscellaneous  (N=45) | Cardiac monitoring abnormal | 1(0.16) | 3(0.96) | 4(0.42) |
| Echocardiogram abnormal | 0(0.00) | 1(0.32) | 1(0.11) |
| Electrocardiogram abnormal | 18(2.81) | 5(1.60) | 23(2.42) |
| Electrocardiogram ambulatory abnormal | 1(0.16) | 0(0.00) | 1(0.11) |
| Electrocardiogram change | 1(0.16) | 0(0.00) | 1(0.11) |
| Electrocardiogram PR prolongation | 0(0.00) | 1(0.32) | 1(0.11) |
| Electrocardiogram QT prolonged | 3(0.47) | 0(0.00) | 3(0.32) |
| Electrocardiogram ST segment depression | 0(0.00) | 1(0.32) | 1(0.11) |
| Electrocardiogram ST segment elevation | 0(0.00) | 5(1.60) | 5(0.53) |
| Electrocardiogram T wave abnormal | 0(0.00) | 2(0.64) | 2(0.21) |
| Electrocardiogram T wave inversion | 1(0.16) | 1(0.32) | 2(0.21) |
| Electrocardiogram T wave peaked | 0(0.00) | 1(0.32) | 1(0.11) |
| Non –Specific  (N=730) | Arrhythmia | 14(2.19) | 5(1.60) | 19(2.00) |
| Cardiac fibrillation | 0(0.00) | 1(0.32) | 1(0.11) |
| Cardiac flutter | 12(1.88) | 1(0.32) | 13(1.37) |
| Extrasystoles | 11(1.72) | 6(1.92) | 17(1.79) |
| Tachycardia | 486(75.94) | 191(61.22) | 677(71.11) |
| Tachycardia paroxysmal | 3(0.47) | 0(0.00) | 3(0.32) |

**Table 3**: Cardiovascular Related Adverse Drug Events Suspected to Be Caused by 1222 ASTRA ZENECA vaccine Use in COVID -19:

| **Broad heading** | **Specific adverse event** | **Non-serious** | **Serious** | **Total** |
| --- | --- | --- | --- | --- |
| **N (%)** | **N (%)** | **N (%)** |
| **(n=118)** | **(n=144)** | **(n=262)** |
| Cardiac Disorder | Bradycardia | 0(0.00) | 2(1.39) | 2(0.76) |
| (N=132) | Cardiac arrest | 0(0.00) | 1(0.69) | 1(0.38) |
|  | Cardiac disorder | 0(0.00) | 1(0.69) | 1(0.38) |
|  | Cardiac failure | 0(0.00) | 0(0.00) | 0(0.00) |
|  | Myocardial infarction | 0(0.00) | 1(0.69) | 1(0.38) |
|  | Palpitations | 31(26.27) | 33(22.92) | 64(24.43) |
|  | Sinus tachycardia | 1(0.85) | 2(1.39) | 3(1.15) |
|  | Supraventricular tachycardia | 0(0.00) | 2(1.39) | 2(0.76) |
|  | Tachycardia | 21(17.80) | 37(25.69) | 58(22.14) |
| Investigations | Blood pressure decreased | 0(0.00) | 1(0.69) | 1(0.38) |
| (N=34) | Blood pressure increased | 2(1.69) | 0(0.00) | 2(0.76) |
|  | Heart rate decreased | 1(0.85) | 1(0.69) | 2(0.76) |
|  | Heart rate increased | 9(7.63) | 16(11.11) | 25(9.54) |
|  | Heart rate irregular | 0(0.00) | 1(0.69) | 1(0.38) |
|  | Pulse abnormal | 1(0.85) | 0(0.00) | 1(0.38) |
|  | International normalised ratio increased | 0(0.00) | 2(1.39) | 2(0.76) |
| Vascular Disorder | Hot flush | 24(20.34) | 20(13.89) | 44(16.79) |
| (N=96) | Circulatory collapse | 0(0.00) | 1(0.69) | 1(0.38) |
|  | Flushing | 6(5.08) | 7(4.86) | 13(4.96) |
|  | Haematoma | 1(0.85) | 0(0.00) | 1(0.38) |
|  | Haemorrhage | 1(0.85) | 0(0.00) | 1(0.38) |
|  | Hypertension | 2(1.69) | 2(1.39) | 4(1.53) |
|  | Hypotension | 3(2.54) | 4(2.78) | 7(2.67) |
|  | Pallor | 6(5.08) | 5(3.47) | 11(4.20) |
|  | Peripheral coldness | 9(7.63) | 2(1.39) | 11(4.20) |
|  | Raynaud's phenomenon | 0(0.00) | 2(1.39) | 2(0.76) |
|  | Shock | 0(0.00) | 1(0.69) | 1(0.38) |

**Table 4**: Analysis of Electrocardiographic Findings among Reported Adverse Drug Events Associated with 1222 ASTRA ZENECA vaccine in COVID-19:

| **Electrocardiogram findings** | **Specific findings** | **Non- Serious n (%)**  **(N=22)** | **Serious**  **n (%)**  **(N=43)** | **Total**  **n (%)**  **(N=65)** |
| --- | --- | --- | --- | --- |
| Tachyarrhythmias  (N=5) | Sinus tachycardia | 1(4.45) | 2(4.65) | 3(4.76) |
| Supraventricular tachycardia | 0(0.00) | 2(4.65) | 2(3.17) |
| Non-Specific  (N=60) | Tachycardia | 21(95.45) | 37(86.05) | 58(92.06) |
| Bradycardia | 0(0.00) | 2(4.65) | 2(3.17) |

**Table 5**: Cardiovascular Related Adverse Drug Events Suspected to Be Caused by Moderna vaccine Use in COVID -19.

| **Broad heading** | **Specific adverse event** | **Non- serious** | **Serious** | **Total** |
| --- | --- | --- | --- | --- |
|  |  |  |
| **n (%)** | **n (%)** | **n (%)** |
| **(n=223)** | **(n=177)** | **(n=400)** |
| Cardiac Disorder | Acute coronary syndrome | 0(0.00) | 1(0.56) | 1(0.25) |
| (N=208) | Angina unstable | 1(0.45) | 0(0.00) | 1(0.25) |
|  | Aortic valve calcification | 0(0.00) | 1(0.56) | 1(0.25) |
|  | Arrhythmia | 0(0.00) | 1(0.56) | 1(0.25) |
|  | Arteriosclerosis | 0(0.00) | 1(0.56) | 1(0.25) |
|  | Arteriosclerosis coronary artery | 0(0.00) | 2(1.13) | 2(0.50) |
|  | Atrial enlargement | 0(0.00) | 1(0.56) | 1(0.25) |
|  | Atrial fibrillation | 0(0.00) | 3(1.69) | 3(0.75) |
|  | Blood pressure abnormal | 0(0.00) | 1(0.56) | 1(0.25) |
|  | Bradycardia | 2(0.90) | 8(4.52) | 10(2.50) |
|  | C-reactive protein increased | 0(0.00) | 8(4.52) | 8(2.00) |
|  | Cardiac arrest | 0(0.00) | 1(0.56) | 1(0.25) |
|  | Cardiac discomfort | 1(0.45) | 2(1.13) | 3(0.75) |
|  | Cardiac disorder | 0(0.00) | 1(0.56) | 1(0.25) |
|  | Cardiac failure congestive | 0(0.00) | 1(0.56) | 1(0.25) |
|  | Cardiac flutter | 1(0.45) | 1(0.56) | 2(0.50) |
|  | Cardio-respiratory arrest | 0(0.00) | 1(0.56) | 1(0.25) |
|  | Cardiomegaly | 0(0.00) | 2(1.13) | 2(0.50) |
|  | Catheterisation cardiac abnormal | 0(0.00) | 1(0.56) | 1(0.25) |
|  | Coronary artery disease | 0(0.00) | 2(1.13) | 2(0.50) |
|  | Coronary artery stenosis | 0(0.00) | 1(0.56) | 1(0.25) |
|  | Echocardiogram abnormal | 0(0.00) | 1(0.56) | 1(0.25) |
|  | Ejection fraction decreased | 0(0.00) | 2(1.13) | 2(0.50) |
|  | Electrocardiogram PR shortened | 0(0.00) | 1(0.56) | 1(0.25) |
|  | Electrocardiogram Q wave abnormal | 0(0.00) | 1(0.56) | 1(0.25) |
|  | Electrocardiogram ST segment elevation | 0(0.00) | 1(0.56) | 1(0.25) |
|  | Electrocardiogram T wave abnormal | 0(0.00) | 1(0.56) | 1(0.25) |
|  | Extrasystoles | 1(0.45) | 1(0.56) | 2(0.50) |
|  | Fibrin D dimer increased | 0(0.00) | 2(1.13) | 2(0.50) |
|  | Heart sounds abnormal | 0(0.00) | 1(0.56) | 1(0.25) |
|  | International normalised ratio increased | 0(0.00) | 2(1.13) | 2(0.50) |
|  | Left ventricular end-diastolic pressure increased | 0(0.00) | 1(0.56) | 1(0.25) |
|  | Myocardial infarction | 0(0.00) | 3(1.69) | 3(0.75) |
|  | Palpitations | 45(20.18) | 11(6.21) | 56(14.00) |
|  | Postural orthostatic tachycardia syndrome | 0(0.00) | 1(0.56) | 1(0.25) |
|  | Prothrombin time prolonged | 0(0.00) | 1(0.56) | 1(0.25) |
|  | Sinus tachycardia | 0(0.00) | 6(3.39) | 6(1.50) |
|  | Stress cardiomyopathy | 0(0.00) | 1(0.56) | 1(0.25) |
|  | Supraventricular extrasystoles | 1(0.45) | 0(0.00) | 1(0.25) |
|  | Supraventricular tachycardia | 0(0.00) | 5(2.82) | 5(1.25) |
|  | Tachyarrhythmia | 0(0.00) | 1(0.56) | 1(0.25) |
|  | Tachycardia | 50(22.42) | 13(7.34) | 63(15.75) |
|  | Troponin increased | 0(0.00) | 5(2.82) | 5(1.25) |
|  | Ventricular arrhythmia | 0(0.00) | 1(0.56) | 1(0.25) |
|  | Ventricular extrasystoles | 1(0.45) | 1(0.56) | 2(0.50) |
|  | Ventricular hypokinesia | 0(0.00) | 1(0.56) | 1(0.25) |
|  | Ventricular tachycardia | 0(0.00) | 1(0.56) | 1(0.25) |
| Investigations | Blood pressure decreased | 1(0.45) | 2(1.13) | 3(0.75) |
| (N=105) | Blood pressure immeasurable | 2(0.90) | 0(0.00) | 2(0.50) |
|  | Blood pressure increased | 21(9.42) | 8(4.52) | 29(7.25) |
|  | Blood pressure orthostatic abnormal | 1(0.45) | 0(0.00) | 1(0.25) |
|  | Blood pressure systolic abnormal | 2(0.90) | 0(0.00) | 2(0.50) |
|  | Blood pressure systolic decreased | 1(0.45) | 0(0.00) | 1(0.25) |
|  | C-reactive protein decreased | 1(0.45) | 0(0.00) | 1(0.25) |
|  | Electrocardiogram abnormal | 2(0.90) | 8(4.52) | 1(2.50) |
|  | Heart rate decreased | 2(0.90) | 0(0.00) | 2(0.50) |
|  | Heart rate increased | 35(15.70) | 13(7.34) | 48(12.00) |
|  | Pulse abnormal | 0(0.00) | 1(0.56) | 1(0.25) |
|  | Pulse absent | 0(0.00) | 5(2.82) | 5(1.25) |
| Vascular Disorder | Hot flush | 10(4.48) | 4(2.26) | 14(3.50) |
| (N=147) | Hypertension | 12(5.38) | 2(1.13) | 14(3.50) |
|  | Hypotension | 3(1.35) | 7 | 10(2.50) |
|  | Pallor | 15(6.73) | 3(1.69) | 18(4.50) |
|  | Peripheral coldness | 6(2.69) | 3(1.69) | 9(2.25) |
|  | Raynaud's phenomenon | 1(0.45) | 0(0.00) | 1(0.25) |
|  | Thrombosis | 1(0.45) | 1(0.56) | 2(0.50) |
|  | Vascular occlusion | 1(0.45) | 0(0.00) | 1(0.25) |
|  | Flushing | 1(0.45) | 15(8.47) | 16(4.00) |
|  | Haemorrhage | 1(0.45) | 0(0.00) | 1(0.25) |
|  | Vein discolouration | 1(0.45) | 0(0.00) | 1(0.25) |

|  |  |  |  |  |
| --- | --- | --- | --- | --- |
|  |  |  |  |  |

**Table 6**: Analysis of Electrocardiographic Findings Among Reported Adverse Drug Events Associated with Moderna vaccine in COVID-19:

| **Electrocardiogram findings** | **Specific findings** | **Non- Serious n (%)**  **(N=58)** | **Serious**  **n (%)**  **(N=55)** | **Total**  **n (%)**  **(N=111)** |
| --- | --- | --- | --- | --- |
| Tachyarrhythmias  (N=20) | Atrial fibrillation | 0 (0.00) | 3(5.45) | 3(2.70) |
| Supraventricular tachycardia | 0 (0.00) | 5(9.09) | 5(4.50) |
| Supraventricular extrasystoles | 1(1.72) | 0(0.00) | 1(0.90) |
| Sinus tachycardia | 0 (0.00) | 6(10.91) | 6(5.41) |
| Tachyarrhythmia | 0 (0.00) | 1(1.82) | 1(0.90) |
| Ventricular arrhythmia | 0 (0.00) | 1(1.82) | 1(0.90) |
| Ventricular tachycardia | 0 (0.00) | 1(1.82) | 1(0.90) |
| Ventricular extrasystoles | 1(1.72) | 1(1.82) | 2(1.80) |
| Bradyarrhythmias  (N=10) | Bradycardia | 2(3.45) | 8(14.55) | 10(9.01) |
| Miscellaneous  (N=14) | Electrocardiogram PR shortened | 0 (0.00) | 1(1.82) | 1(0.90) |
| Electrocardiogram ST segment elevation | 0 (0.00) | 1(1.82) | 1(0.90) |
| Electrocardiogram abnormal | 2(3.645) | 8(14.55) | 10(9.01) |
| Electrocardiogram Q wave abnormal | 0 (0.00) | 1(1.82) | 1(0.90) |
| Electrocardiogram T wave abnormal | 0 (0.00) | 1(1.82) | 1(0.90) |
| Non-Specific  (N=67) | Ventricular hypokinesia | 0 (0.00) | 1(1.82) | 1(0.90) |
| Extrasystoles | 1(1.72) | 1(1.82) | 2(1.80) |
| Arrhythmia | 0(0.00) | 1(1.82) | 1(0.90) |
| Cardiac flutter | 1(1.72) | 1(1.82) | 2(1.80) |
| Tachycardia | 50(86.21) | 13(23.64) | 61(59.80) |
